# Supplementary material
Source: Springer Nature journal article supplement (https://www.springerprofessional.de/resource/supplementary/40008_2013_18_MOESM3_ESM.lsp/11899454)
Supplement: MOESM3 [file 11899454]

// triangulate_iot.lsp --- Triangulation of an input-output table
//
// Input-data file contains an IOT to be triangulated in the SSV format,
// where SSV refers to space-separated values.
//
// The number of sectors, NSec, and the name of input-data file, inFile,
// must always be provided.
//
// The optimal permutation is printed to the standard output.
//

function input() {
  usage = "\n"
    + "Usage: localsolver triangulate_iot.lsp NSec=number_of_sectors"
    + " inFileName=DataFileName [lsTimeLimit=timeLimit]\n";

  if (NSec == nil || inFileName == nil) {
    error(usage);
  }
  NS = NSec - 1;

  inFile = openRead(inFileName);
  datum[0..(NSec*NSec - 1)] = readDouble(inFile);
}

function model() {
  // p[i][j] == 1 if sector i is at the j-th position
  p[0..NS][0..NS] <- bool();

  // one sector per position j
  for [j in 0..NS] {
    constraint sum[i in 0..NS](p[i][j]) == 1;
  }
  // one position per sector i
  for [i in 0..NS] {
    constraint sum[j in 0..NS](p[i][j]) == 1;
  }

  // sec[j] is sector at the j-th position.
  sec[j in 0..NS] <- min(NS, max(0, sum[i in 0..NS](i * p[i][j])));

  denom = sum[i in 0..NS][j in 0..NS : i != j](datum[NSec * i + j]);

  DegLin <- sum[i in 1..NS][j in 0..i-1](datum[NSec * sec[i] + sec[j]]) / denom;

  maximize DegLin;
}


function param() {
  if (lsTimeLimit == nil) lsTimeLimit = 20;
}


function output() {
  for [j in 0..NS] print((getValue(sec[j]) + 1) + " ");
  println();
}
